# Supplementary material for: Impact of Sr segregation on the electronic structure and oxygen reduction activity of SrTi1−xFexO3 surfaces
Source: Royal Society of Chemistry journal article supplement (doi:10.1039/c2ee21463f), 2012-01-01
Supplement: c2ee21463f.pdf [file c2ee21463f.pdf]

# Supporting materials for “Impact of Sr segregation on the electronic structure and oxygen reduction activity of $\text{SrTi}_{1-x}\text{Fe}_x\text{O}_3$ surfaces”

Yan Chen,<sup>a</sup> WooChul Jung,<sup>b,c</sup> Zhuhua Cai,<sup>a</sup> Jae Jin Kim,<sup>b</sup> Harry L. Tuller<sup>b</sup> and Bilge Yildiz\*<sup>a</sup>

<sup>a</sup> Laboratory for Electrochemical Interfaces, Department of Nuclear Science and Engineering, Massachusetts Institute of Technology, Cambridge, MA 02139, USA. ; Fax: 617-258-8863; Tel: 617-324-4009; E-mail: byildiz@mit.edu

<sup>b</sup> Department of Materials Science and Engineering, Massachusetts Institute of Technology, Cambridge, MA 02139, USA.

<sup>c</sup> Present address: Department of Materials Science, California Institute of Technology, Pasadena, CA 91125 USA

\* byildiz@mit.edu

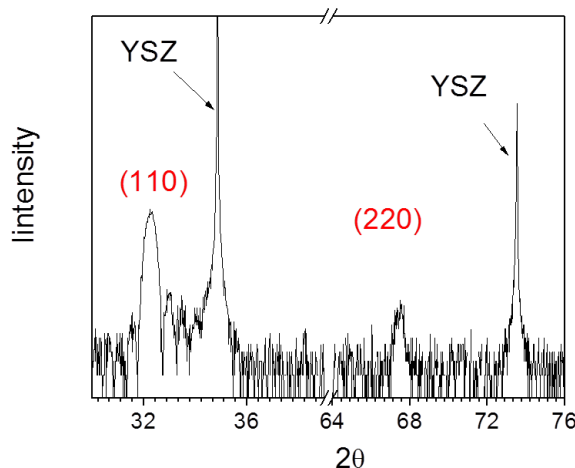

Fig. S1: Representative high resolution x-ray diffraction pattern of the  $\text{SrTi}_{1-x}\text{Fe}_x\text{O}_3$  films in this work, showing highly textured structure in the (110) out-of-plane direction. The specific data shown here is from the STF35 film.

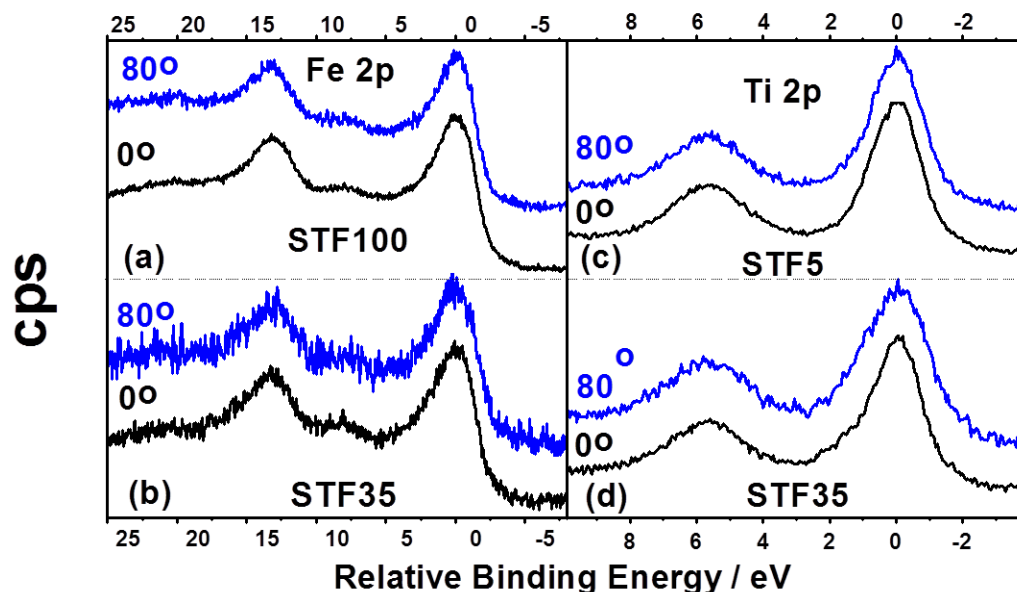

Fig. S2: (a-b) Comparison of the Fe 2p spectra in the bulk ( $0^\circ$ ) and on the surface ( $80^\circ$ ) of  $\text{SrTi}_{0.65}\text{Fe}_{0.35}\text{O}_3$  (STF35) and  $\text{SrFeO}_3$  (STF100). (c-d) Comparison of the Ti 2p spectra in the bulk ( $0^\circ$ ) and on the surface ( $80^\circ$ ) of  $\text{SrTi}_{0.95}\text{Fe}_{0.05}\text{O}_3$  (STF5) and  $\text{SrTi}_{0.65}\text{Fe}_{0.35}\text{O}_3$  (STF35).

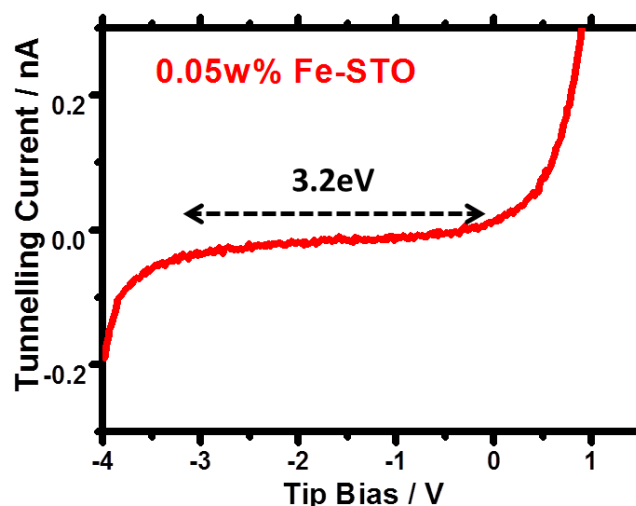

Fig. S3 : The tunneling current versus tip bias data on 0.05 w% Fe-doped  $\text{SrTiO}_3$  single crystal substrate (from MTI Corporation, Richmond, CA) at  $345^\circ\text{C}$ ,  $P_{\text{O}_2} \sim 10^{-3}$  mbar. The Fermi level is closer to the top of valence band (positive tip bias), which is consistent with the acceptor doped nature of the sample. The small slope existing in the tunneling spectra within the range of from 0 to -3.2 eV closely represents the band gap of  $\text{SrTiO}_3$ . The non-zero slope of the tunneling current within the band gap energy range is due to the defect states created within the gap at high temperature and/or with Fe doping.

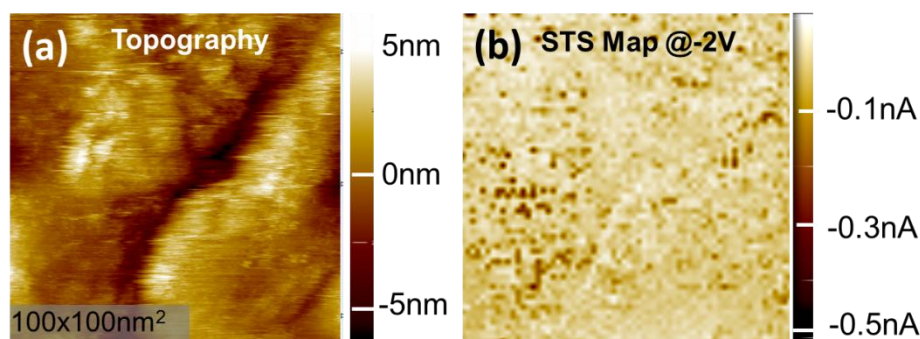

Fig. S4 : (a) Topography image taken by scanning tunneling microscopy and (b) tunneling current map measured by scanning tunneling spectroscopy on  $\text{SrTi}_{0.95}\text{Fe}_{0.05}\text{O}_3$  (STF5) at  $345^\circ\text{C}$ ,  $P_{\text{O}_2} \sim 10^{-3}$  mbar. No clear correlation between structural features, e. g. grain boundaries, and the tunneling current magnitude is found.

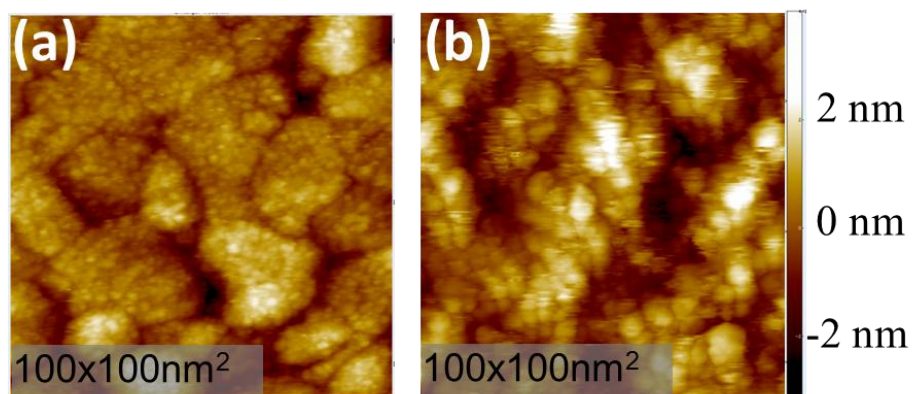

Fig. S5: Surface structure of the  $\text{SrTi}_{0.65}\text{Fe}_{0.35}\text{O}_3$  (STF35) measured by scanning tunneling microscopy at  $345^\circ\text{C}$ ,  $P_{\text{O}_2} \sim 1 \times 10^{-3}$  (a) before chemical etching, and (b) after chemical etching (using 0.14 mol/l HCl for 10 s).
